# Supplementary material for: Echinomycin inhibits adipogenesis in 3T3-L1 cells in a HIF-independent manner
Source: PubMed Central journal article supplement (PMC5529514; doi:10.1038/s41598-017-06761-4), 2017-07-26
Supplement: 41598_2017_6761_MOESM1_ESM.pdf [file 41598_2017_6761_MOESM1_ESM.pdf]

**Echinomycin inhibits adipogenesis in 3T3-L1 cells in a HIF-independent manner****Junna Yamaguchi, Tetsuhiro Tanaka, Hisako Saito, Seitaro Nomura, Hiroyuki Aburatani, Hironori Waki, Takashi Kadowaki, Masaomi Nangaku****Table S1. The list of 2,204 probes in the microarray analysis**

| <b>Cluster 1 (751 probes)</b> |                    | <b>Cluster 2 (907probes)</b> |                    | <b>Cluster 3 (546probes)</b> |                    |
|-------------------------------|--------------------|------------------------------|--------------------|------------------------------|--------------------|
| <b>Probe Set ID</b>           | <b>Gene Symbol</b> | <b>Probe Set ID</b>          | <b>Gene Symbol</b> | <b>Probe Set ID</b>          | <b>Gene Symbol</b> |
| 1417483_at                    | Nfkbiz             | 1451666_at                   | Acly               | 1416101_a_at                 | Hist1h1c           |
| 1416630_at                    | Id3                | 1426533_at                   | Nop56              | 1436994_a_at                 | Hist1h1c           |
| 1418932_at                    | Nfil3              | 1427504_s_at                 | Srsf2              | 1419022_a_at                 | Eno1               |
| 1435162_at                    | Prkg2              | 1435335_a_at                 | Gnptab             | 1427404_x_at                 | Gm5506             |
| 1424289_at                    | Osgin2             | 1433738_at                   | Papd5              | 1420478_at                   | Nap111             |
| 1415899_at                    | Junb               | 1416034_at                   | Cd24a              | 1416479_a_at                 | Tmem14c            |
| 1426223_at                    | Ttc39c             | 1435945_a_at                 | Kcnn4              | 1452927_x_at                 | Tpi1               |
| 1440041_at                    | ---                | 1448270_at                   | Ddx21              | 1448754_at                   | Rbp1               |
| 1425503_at                    | Gcnt2              | 1452640_at                   | 3110007F17Rik      | 1416708_a_at                 | Gramd1a            |
| 1423233_at                    | Cebpd              | 1422767_at                   | Bysl               | 1434799_x_at                 | Aldoa              |
| 1426418_at                    | Atoh8              | 1426394_at                   | Eif3j              | 1439795_at                   | Gpr64              |
| 1439348_at                    | S100a10            | 1450084_s_at                 | Ivns1abp           | 1415918_a_at                 | Tpi1               |
| 1425895_a_at                  | Id1                | 1424500_at                   | Utp6               | 1416335_at                   | Mif                |
| 1424942_a_at                  | Myc                | 1452052_s_at                 | Eif3j              | 1444952_a_at                 | Nucks1             |
| 1434025_at                    | ---                | 1460541_at                   | Slc7a6             | 1451967_x_at                 | Kpnb1              |
| 1456816_at                    | ---                | 1423703_at                   | Ppan               | 1454783_at                   | Il13ra1            |
| 1448830_at                    | Dusp1              | 1420401_a_at                 | Ramp3              | 1452296_at                   | Slit3              |
| 1447314_at                    | ---                | 1448319_at                   | Akr1b3             | 1452190_at                   | Prcp               |
| 1429053_at                    | 1110012J17Rik      | 1418300_a_at                 | Mknk2              | 1460353_at                   | Tmem48             |
| 1418901_at                    | Cebpb              | 1437133_x_at                 | Akr1b3             | 1450826_a_at                 | Saa3               |
| 1448793_a_at                  | Sdc4               | 1460551_at                   | Ran                | 1452681_at                   | Dtymk              |
| 1442608_at                    | Layn               | 1455904_at                   | Gas5               | 1448441_at                   | Cks1b              |
| 1451177_at                    | Dnajb4             | 1456117_at                   | Rrp1b              | 1423666_s_at                 | LOC100503670       |
| 1451021_a_at                  | Klf5               | 1416529_at                   | Emp1               | 1427921_s_at                 | 2310061C15Rik      |
| 1448231_at                    | Fkbp5              | 1424574_at                   | Tmed5              | 1419823_s_at                 | Ksr1               |
| 1423267_s_at                  | Itga5              | 1417406_at                   | Sertad1            | 1431054_at                   | Lsm6               |
| 1416125_at                    | Fkbp5              | 1416545_at                   | Zdhhc7             | 1438096_a_at                 | Dtymk              |
| 1417871_at                    | Hsd17b7            | 1431789_s_at                 | Tmed5              | 1426002_a_at                 | Cdc7               |
| 1427844_a_at                  | Cebpb              | 1424573_at                   | Tmed5              | 1455892_x_at                 | ---                |
| 1434384_at                    | Nrip1              | 1437502_x_at                 | Cd24a              | 1425789_s_at                 | Anxa8              |
| 1427144_at                    | Hnrpll             | 1455035_s_at                 | Nop56              | 1424006_at                   | Aarsd1             |
| 1455899_x_at                  | Socs3              | 1458268_s_at                 | Igfbp3             | 1416698_a_at                 | Cks1b              |
| 1444107_at                    | C130039O16Rik      | 1428950_s_at                 | Nol8               | 1440715_s_at                 | Cdkn2aipnl         |
| 1416505_at                    | Nr4a1              | 1433502_s_at                 | Tsr1               | 1448975_s_at                 | Ren1 /// Ren2      |
| 1448742_at                    | Snail              | 1455643_s_at                 | Tsr1               | 1418026_at                   | Exo1               |
| 1449851_at                    | Per1               | 1434398_at                   | Nkrf               | 1437181_at                   | Peli2              |
| 1457248_x_at                  | Hsd17b7            | 1448182_a_at                 | Cd24a              | 1420477_at                   | Nap111             |
| 1428393_at                    | Nrn1               | 1448271_a_at                 | Ddx21              | 1446656_at                   | ---                |
| 1455881_at                    | Ier5l              | 1419912_s_at                 | Strap              | 1452200_at                   | Cdkn2aipnl         |
| 1449037_at                    | Crem               | 1441272_at                   | Matr3              | 1423785_at                   | Egln1              |
| 1442213_at                    | LOC552908          | 1425610_s_at                 | Galnt2             | 1433807_at                   | 6720463M24Rik      |
| 1426812_a_at                  | Fam129b            | 1421876_at                   | Mapk9              | 1415860_at                   | Kpna2              |
| 1424296_at                    | Gclc               | 1426236_a_at                 | Glul               | 1449116_a_at                 | Dtymk              |
| 1431734_a_at                  | Dnajb4             | 1450846_at                   | Bzw1               | 1435639_at                   | 2610528A11Rik      |
| 1455959_s_at                  | Gclc               | 1427820_at                   | ---                | 1435659_a_at                 | Tpi1               |
| 1451739_at                    | Klf5               | 1424883_s_at                 | Srsf7              | 1449648_s_at                 | Polr1c             |
| 1417487_at                    | Fosl1              | 1420772_a_at                 | Tsc22d3            | 1423211_at                   | Nop10              |
| 1428942_at                    | Mt2                | 1415907_at                   | Cend3              | 1415829_at                   | Lbr                |
| 1416743_at                    | LOC640502          | 1426235_a_at                 | Glul               | 1422327_s_at                 | G6pd2              |
| 1415834_at                    | Dusp6              | 1423039_a_at                 | Bzw1               | 1415857_at                   | Emb                |
| 1437658_a_at                  | Snhg1              | 1428296_at                   | Gm10774            | 1417732_at                   | Anxa8              |

|              |               |              |               |              |               |
|--------------|---------------|--------------|---------------|--------------|---------------|
| 1431182_at   | Hspa8         | 1453745_at   | 2700038G22Rik | 1416553_at   | Stra13        |
| 1459305_at   | ---           | 1452096_s_at | D230025D16Rik | 1426612_at   | Tipin         |
| 1418176_at   | Vdr           | 1426645_at   | Hsp90aa1      | 1448354_at   | G6pdx         |
| 1416442_at   | Ier2          | 1448204_at   | Sav1          | 1420592_a_at | Anp32e        |
| 1422751_at   | Tle1          | 1439615_at   | Gan           | 1439148_a_at | Pfkl          |
| 1418753_at   | Gfpt2         | 1430980_a_at | Eif4a1        | 1418777_at   | Ccl25         |
| 1460206_at   | Grasp         | 1419385_a_at | Ubqln1        | 1450269_a_at | Pfkl          |
| 1423474_at   | Top1          | 1418507_s_at | Socs2         | 1434695_at   | Dtl           |
| 1420817_at   | Ywhag         | 1425281_a_at | Tsc22d3       | 1458648_at   | AU042950      |
| 1415913_at   | Gm12270       | 1452490_a_at | Ap2a2         | 1452406_x_at | Erdr1         |
| 1418469_at   | Nrip1         | 1456071_a_at | Cycs          | 1436737_a_at | Sorbs1        |
| 1426825_at   | Fmnl3         | 1422801_at   | G3bp1         | 1428471_at   | Sorbs1        |
| 1418175_at   | Vdr           | 1428090_at   | Ptcd3         | 1419737_a_at | Ldha          |
| 1438739_at   | ---           | 1422483_a_at | Cycs          | 1417566_at   | Abhd5         |
| 1420548_a_at | 2310008H09Rik | 1451006_at   | Xdh           | 1425780_a_at | Tmem167       |
| 1438862_at   | ---           | 1448250_at   | 9030425E11Rik | 1435749_at   | Gda           |
| 1423903_at   | Pvr           | 1422667_at   | Krt15         | 1421694_a_at | Vcan          |
| 1422452_at   | Bag3          | 1452461_a_at | Gnptab        | 1427747_a_at | Lcn2          |
| 1437247_at   | Fosl2         | 1425326_at   | Acly          | 1415998_at   | Vdac1         |
| 1417372_a_at | Peli1         | 1435544_at   | Aars          | 1419603_at   | Ifi204        |
| 1425837_a_at | Ccrn4l        | 1433789_at   | Snhg3         | 1426554_a_at | Pgam1         |
| 1425742_a_at | Tsc22d1       | 1439027_at   | Naa25         | 1416164_at   | Fbln5         |
| 1434680_at   | Plekkg3       | 1425656_a_at | Baiap2        | 1423947_at   | 1110008P14Rik |
| 1418835_at   | Phlda1        | 1429587_at   | Rbm34         | 1435748_at   | Gda           |
| 1435039_a_at | Pip5k1a       | 1460260_s_at | Kpna1         | 1433675_at   | Snhg1         |
| 1417654_at   | Sdc4          | 1422444_at   | Itga6         | 1434329_s_at | Adipor2       |
| 1456212_x_at | Socs3         | 1455988_a_at | Cct6a         | 1452094_at   | P4ha1         |
| 1454971_x_at | Tsc22d1       | 1423517_at   | Cct6a         | 1448613_at   | Ecm1          |
| 1416576_at   | Socs3         | 1426351_at   | Hspd1         | 1433674_a_at | Snhg1         |
| 1443088_at   | 9930031P18Rik | 1424843_a_at | Gas5          | 1415856_at   | Emb           |
| 1416129_at   | Errfi1        | 1430147_a_at | Taf1d         | 1416119_at   | Txn1          |
| 1435248_a_at | Btaf1         | 1435740_at   | Gm10397       | 1416249_at   | Nadk          |
| 1422537_a_at | Id2           | 1450986_at   | Nop58         | 1424860_at   | D930016D06Rik |
| 1416431_at   | Tubb6         | 1452168_x_at | Gspt1         | 1438073_at   | Spry3         |
| 1436871_at   | Srsf7         | 1448484_at   | Amd1          | 1426947_x_at | Col6a2        |
| 1419816_s_at | Errfi1        | 1450881_s_at | Gpr137b       | 1452348_s_at | Ifi204        |
| 1448950_at   | Il1r1         | 1428135_a_at | Eef1d         | 1442884_at   | Hgf           |
| 1441315_s_at | Slc19a2       | 1451012_a_at | Csda          | 1429478_at   | 6720463M24Rik |
| 1449110_at   | Rhob          | 1450782_at   | Wnt4          | 1417864_at   | Pgk1          |
| 1437696_at   | BC049807      | 1434242_at   | Usp37         | 1439618_at   | Pde10a        |
| 1434303_at   | Raph1         | 1441687_at   | LOC100503611  | 1417565_at   | Abhd5         |
| 1455657_at   | Smg1          | 1422788_at   | Slc43a3       | 1425826_a_at | Sorbs1        |
| 1419069_at   | Rabgef1       | 1425836_a_at | Limk1         | 1451775_s_at | Il13ra1       |
| 1423667_at   | Mat2a         | 1418527_a_at | Srsf10        | 1423210_a_at | Nop10         |
| 1424246_a_at | Tes           | 1452213_at   | Tex2          | 1420981_a_at | Lmo4          |
| 1420909_at   | Vegfa         | 1417627_a_at | Limk1         | 1428776_at   | Slc10a6       |
| 1451717_s_at | Senp2         | 1449109_at   | Socs2         | 1460238_at   | Msln          |
| 1418302_at   | Ppt2          | 1415910_s_at | Ciapi1        | 1451171_at   | 2310008H04Rik |
| 1452519_a_at | Zfp36         | 1454606_at   | 4933426M11Rik | 1427164_at   | Il13ra1       |
| 1454758_a_at | Tsc22d1       | 1421877_at   | Mapk9         | 1449212_at   | Pip           |
| 1450750_a_at | Nr4a2         | 1417032_at   | Ube2g2        | 1448666_s_at | Tob2          |
| 1447863_s_at | Nr4a2         | 1453849_s_at | Hnrnpab       | 1443983_at   | ---           |
| 1455034_at   | Nr4a2         | 1428275_at   | Abhd13        | 1444472_at   | ---           |
| 1425466_at   | Senp2         | 1422445_at   | Itga6         | 1429590_at   | Tacc1         |
| 1425465_a_at | Senp2         | 1437738_at   | Atp2c1        | 1451866_a_at | Hgf           |
| 1438796_at   | Nr4a3         | 1422454_at   | Krt13         | 1450387_s_at | Ak4           |
| 1434261_at   | Sipa1l2       | 1423062_at   | Igfbp3        | 1424854_at   | Hist1h4a      |
| 1419485_at   | Foxc1         | 1434202_a_at | Fam107a       | 1448601_s_at | Msx1          |

|              |               |              |               |              |               |
|--------------|---------------|--------------|---------------|--------------|---------------|
| 1416029_at   | Klf10         | 1460036_at   | Ap1s2         | 1421830_at   | Ak4           |
| 1428562_at   | 2210403K04Rik | 1435800_a_at | Csda          | 1440311_at   | Sorbs1        |
| 1451819_at   | Zswim6        | 1425930_a_at | Mlx           | 1415852_at   | Impdh2        |
| 1438495_at   | Top1          | 1452662_a_at | Eif2s1        | 1434278_at   | Mtm1          |
| 1451208_at   | Etf1          | 1438945_x_at | Gja1          | 1415851_a_at | Impdh2        |
| 1435249_at   | Btaf1         | 1444361_at   | ---           | 1454935_at   | Fitm2         |
| 1417902_at   | Slc19a2       | 1422484_at   | Cycs          | 1428593_at   | 1700029F09Rik |
| 1459722_at   | Zswim6        | 1437007_x_at | Usp39         | 1416871_at   | Adam8         |
| 1449449_at   | Ptges         | 1438546_x_at | Slc25a5       | 1426992_at   | Xpr1          |
| 1438019_at   | Ippk          | 1456620_at   | Gnptab        | 1423827_s_at | Noc4l         |
| 1443969_at   | Irs2          | 1424474_a_at | Camkk2        | 1417972_s_at | Pop5          |
| 1428433_at   | Hipk2         | 1454957_at   | Nob1          | 1454109_a_at | Jmjd6         |
| 1434967_at   | Zswim6        | 1436000_a_at | Skp2          | 1423708_a_at | Farsb         |
| 1458469_at   | Cblb          | 1450423_s_at | Rpf2          | 1439435_x_at | Pgk1          |
| 1430697_at   | Ammecr1       | 1423795_at   | Sfpq          | 1448809_at   | Cse1l         |
| 1435176_a_at | Id2           | 1418225_at   | Orc2          | 1416439_at   | Dctpp1        |
| 1422168_a_at | Bdnf          | 1428277_at   | Otud6b        | 1449198_a_at | St3gal5       |
| 1449089_at   | Nrip1         | 1425718_a_at | Ivns1abp      | 1416850_s_at | Cisd1         |
| 1419149_at   | Serpine1      | 1435695_a_at | Ggct          | 1417353_x_at | Snrpa1        |
| 1444165_at   | Layn          | 1428553_at   | Glrx5         | 1436966_at   | Peli2         |
| 1451959_a_at | Vegfa         | 1456738_s_at | Brp16         | 1423749_s_at | Rangap1       |
| 1429321_at   | Rnf149        | 1429169_at   | Rbm3          | 1451385_at   | Fam162a       |
| 1454724_x_at | Fam108b       | 1428542_at   | Eif1ad        | 1417308_at   | Pkm2          |
| 1456477_at   | Ccnt1         | 1447209_at   | ---           | 1417352_s_at | Snrpa1        |
| 1442332_at   | ---           | 1427256_at   | Vcan          | 1417149_at   | P4ha2         |
| 1419431_at   | Ereg          | 1416218_x_at | Rpl37a        | 1434509_at   | Rapgef6       |
| 1443394_at   | ---           | 1455345_at   | Phf15         | 1420056_s_at | Jmjd6         |
| 1427348_at   | Zc3h12a       | 1438527_at   | Gm5879        | 1436796_at   | LOC100503380  |
| 1433771_at   | Fam108b       | 1416503_at   | Lxn           | 1451092_a_at | Rangap1       |
| 1419766_at   | Sik1          | 1425553_s_at | Hip1r         | 1430353_at   | Glis3         |
| 1440643_at   | ---           | 1438458_a_at | Sfpq          | 1416042_s_at | Nasp          |
| 1438187_at   | Slc25a29      | 1439399_a_at | Snhg1         | 1453183_at   | 1110034A24Rik |
| 1422702_at   | Azin1         | 1451071_a_at | Atp1a1        | 1436544_at   | Atp10d        |
| 1458241_at   | ---           | 1441070_at   | LOC100504154  | 1447999_x_at | Gapdh         |
| 1441823_at   | Zmiz1         | 1422411_s_at | BC151093      | 1451204_at   | Scara5        |
| 1416502_a_at | Preb          | 1425552_at   | Hip1r         | 1426529_a_at | Tagln2        |
| 1417621_at   | Nfatc1        | 1416726_s_at | Ube2s         | 1417480_at   | Fbxo9         |
| 1451714_a_at | Map2k3        | 1423810_at   | Ppme1         | 1452661_at   | Tfrc          |
| 1455342_at   | Prune2        | 1416075_at   | Sav1          | 1417109_at   | Tinagl1       |
| 1437239_x_at | Phc2          | 1450904_at   | Tmem167       | 1415909_at   | Stip1         |
| 1421321_a_at | Net1          | 1423208_at   | Tmem167       | 1436705_at   | Mmgt1         |
| 1435644_at   | Sh3pxd2b      | 1415850_at   | Rasa3         | 1428589_at   | Mrpl41        |
| 1428902_at   | Chst11        | 1416120_at   | Rrm2          | 1448140_at   | Ciapiin1      |
| 1427299_at   | Rps6ka3       | 1443253_at   | ---           | 1452608_at   | Mycbp         |
| 1452359_at   | Rell1         | 1437923_at   | AI314760      | 1423863_at   | Abcf2         |
| 1419656_at   | Slc25a36      | 1420810_at   | 1500003O03Rik | 1423357_at   | Lipt2         |
| 1427243_at   | Rell1         | 1437210_a_at | Brd2          | 1418674_at   | Osmr          |
| 1458616_at   | ---           | 1417309_at   | Tob2          | 1427257_at   | Vcan          |
| 1454755_at   | Itpkc         | 1422474_at   | Pde4b         | 1416480_a_at | Gm9790        |
| 1418099_at   | Tnfrsf1b      | 1418879_at   | Fam110c       | 1431997_at   | 3000002C10Rik |
| 1424013_at   | Etf1          | 1423585_at   | Igfbp7        | 1416746_at   | H2afx         |
| 1425456_a_at | Map2k3        | 1448226_at   | Rrm2          | 1437045_at   | Mapk8         |
| 1433724_at   | D15Erttd621e  | 1434437_x_at | Rrm2          | 1450743_s_at | Syncrip       |
| 1437493_at   | 5230400M03Rik | 1428132_at   | Cdc42se1      | 1415901_at   | Plod3         |
| 1417162_at   | Tmbim1        | 1448377_at   | Slpi          | 1423653_at   | Atp1a1        |
| 1430352_at   | Adamts9       | 1449824_at   | Prg4          | 1428131_a_at | Cdc42se1      |
| 1450749_a_at | Nr4a2         | 1448667_x_at | Tob2          | 1416481_s_at | Higd1a        |
| 1438133_a_at | Cyr61         | 1449336_a_at | Slk           | 1435474_at   | Taf5          |

|              |               |              |               |              |               |
|--------------|---------------|--------------|---------------|--------------|---------------|
| 1416039_x_at | Cyr61         | 1422473_at   | Pde4b         | 1424110_a_at | Nme1          |
| 1435777_at   | Itrip12       | 1453906_at   | Med131        | 1436181_at   | Asap2         |
| 1451415_at   | 1810011O10Rik | 1421354_at   | Prkg2         | 1423642_at   | Tubb2c        |
| 1454788_at   | Arl4c         | 1457644_s_at | Cxcl1         | 1452743_at   | Pole3         |
| 1436512_at   | Arl4c         | 1448503_at   | Mcl1          | 1447930_at   | Baz1a         |
| 1449168_a_at | Akap2         | 1451982_at   | Map2k4        | 1416073_a_at | Nup85         |
| 1440332_at   | Cdv3          | 1420150_at   | Spsb1         | 1429057_at   | Naa16         |
| 1439797_at   | Ppard         | 1441894_s_at | Grasp         | 1427760_s_at | Prl2c2        |
| 1427929_a_at | Pdxk          | 1448865_at   | Hsd17b7       | 1416203_at   | Aqp1          |
| 1460510_a_at | Coq10b        | 1435655_at   | Rpl12         | 1435167_at   | Ranbp6        |
| 1422560_at   | Ddi2          | 1423766_at   | Pak1ip1       | 1417351_a_at | Snrpa1        |
| 1438657_x_at | Gm13363       | 1416067_at   | Ifrd1         | 1424348_at   | 1110007A13Rik |
| 1433943_at   | Itrip         | 1418946_at   | St3gal1       | 1434754_at   | Rap1gap2      |
| 1427931_s_at | Pdxk          | 1451532_s_at | Steap1        | 1422412_x_at | Ear3          |
| 1416701_at   | Rnd3          | 1424938_at   | Steap1        | 1418659_at   | Clock         |
| 1426721_s_at | Tiparp        | 1434089_at   | Synpo         | 1451527_at   | Pcolce2       |
| 1433576_at   | Mat2a         | 1451272_a_at | Ube2f         | 1431125_a_at | Tars2         |
| 1425351_at   | Srxn1         | 1449450_at   | Ptges         | 1427938_at   | Mycbp         |
| 1451027_at   | Baiap2        | 1434312_at   | Arf6          | 1416433_at   | Rpa2          |
| 1422864_at   | Runx1         | 1430034_at   | Cct4          | 1433482_a_at | Fubp1         |
| 1447411_at   | ---           | 1416308_at   | Ugdh          | 1424143_a_at | Cdt1          |
| 1449322_at   | Gm13363       | 1457150_at   | AI428301      | 1423924_s_at | Tspan14       |
| 1444326_at   | ---           | 1435110_at   | Unc5b         | 1417667_a_at | Pter          |
| 1419024_at   | Ptp4a1        | 1444538_at   | ---           | 1419270_a_at | Dut           |
| 1417262_at   | Ptgs2         | 1457944_at   | ---           | 1417948_s_at | Ilf2          |
| 1442069_at   | Ept1          | 1452119_at   | Rrp1b         | 1417886_at   | 1810009A15Rik |
| 1417723_at   | Ube2j1        | 1416811_s_at | Ctla2a        | 1426447_at   | Nup35         |
| 1419078_at   | Nin           | 1448471_a_at | Ctla2a        | 1422535_at   | Ccne2         |
| 1455870_at   | Akap2         | 1416745_x_at | LOC640502     | 1435114_at   | Wdhd1         |
| 1454648_s_at | D10Wsu102e    | 1418250_at   | Arl4d         | 1436708_x_at | Mcm4          |
| 1441843_s_at | 5230400M03Rik | 1434376_at   | Cd44          | 1434683_at   | ---           |
| 1428834_at   | Dusp4         | 1418911_s_at | Acs14         | 1452241_at   | Topbp1        |
| 1451253_at   | Pxk           | 1449901_a_at | Map3k6        | 1421731_a_at | Fen1          |
| 1437743_at   | Aebp2         | 1416880_at   | Mcl1          | 1429395_at   | Gsted         |
| 1428487_s_at | Coq10b        | 1433531_at   | Acs14         | 1459897_a_at | Sbsn          |
| 1427930_at   | Pdxk          | 1460227_at   | Timp1         | 1439651_at   | ---           |
| 1421034_a_at | Il4ra         | 1437527_x_at | Mcl1          | 1423218_a_at | Mrpl49        |
| 1450714_at   | Azin1         | 1426233_at   | Map2k4        | 1419645_at   | Cstf2         |
| 1435595_at   | 1810011O10Rik | 1426348_at   | Col4a1        | 1433547_s_at | Nudcd1        |
| 1437199_at   | Dusp5         | 1422943_a_at | Hspb1         | 1436422_at   | BC026590      |
| 1452160_at   | Tiparp        | 1426370_at   | Far1          | 1426492_at   | Tdp1          |
| 1433617_s_at | B4galt5       | 1430875_a_at | Pak1ip1       | 1417144_at   | Tubg1         |
| 1452675_at   | Rbm22         | 1416744_at   | LOC640502     | 1439630_x_at | Sbsn          |
| 1439168_at   | Camk2d        | 1448232_x_at | Gm5620        | 1434224_at   | Tbl2          |
| 1417740_at   | Cdc3711       | 1450262_at   | Clcf1         | 1452996_a_at | Aven          |
| 1453149_at   | Slc25a32      | 1433555_at   | Eaf1          | 1416544_at   | Ezh2          |
| 1418102_at   | Hes1          | 1438405_at   | Fgf7          | 1457827_at   | Arsj          |
| 1434302_at   | LOC100504603  | 1417430_at   | Cdr2          | 1424300_at   | Gemin6        |
| 1427763_a_at | Camk2d        | 1426337_a_at | Tead4         | 1417586_at   | Timeless      |
| 1437742_at   | Rab21         | 1440120_at   | ---           | 1427382_a_at | Suv39h1       |
| 1452161_at   | Tiparp        | 1456381_x_at | Mcl1          | 1454011_a_at | Rpa2          |
| 1458802_at   | Hivep3        | 1436155_at   | Nmnat2        | 1416030_a_at | Mcm7          |
| 1456341_a_at | Klf9          | 1449002_at   | Phlda3        | 1423809_at   | Tcf19         |
| 1416700_at   | Rnd3          | 1452182_at   | Galnt2        | 1424632_a_at | Rev3l         |
| 1421624_a_at | Enah          | 1449268_at   | Gfpt1         | 1449530_at   | Trps1         |
| 1419357_at   | Isy1          | 1425658_at   | Cd109         | 1439436_x_at | Incenp        |
| 1459865_x_at | Ces5a         | 1419682_a_at | 2810408M09Rik | 1415878_at   | Rrm1          |
| 1425983_x_at | Hipk2         | 1426426_at   | Mak16         | 1434748_at   | Ckap2         |

|              |               |              |               |              |               |
|--------------|---------------|--------------|---------------|--------------|---------------|
| 1431894_at   | Itrip         | 1429080_at   | Mphosph10     | 1422430_at   | Figl1         |
| 1428289_at   | Klf9          | 1451039_at   | 2610027L16Rik | 1438320_s_at | Mcm7          |
| 1436387_at   | C330006P03Rik | 1458097_at   | Cobll1        | 1420028_s_at | Mcm3          |
| 1457573_at   | Top1          | 1438606_a_at | Clic4         | 1416031_s_at | Mcm7          |
| 1424457_at   | Apbb3         | 1437785_at   | Adamts9       | 1426652_at   | Mcm3          |
| 1450722_at   | Nup50         | 1423393_at   | Clic4         | 1448777_at   | Mcm2          |
| 1438761_a_at | Odc1          | 1416440_at   | Cd164         | 1434993_at   | Fam5c         |
| 1438630_x_at | Mat2a         | 1417040_a_at | Bok           | 1419452_at   | Uchl5         |
| 1448802_at   | Nufip1        | 1450928_at   | Id4           | 1417541_at   | Hells         |
| 1422851_at   | Hmga2         | 1448916_at   | Mafg          | 1429364_at   | 4930579G24Rik |
| 1450781_at   | Hmga2         | 1448689_at   | Rras2         | 1418727_at   | Nup155        |
| 1444565_at   | BB166591      | 1456243_x_at | Mcl1          | 1416737_at   | Gys1          |
| 1442340_x_at | Cyr61         | 1428350_at   | Ctu2          | 1448127_at   | Rrm1          |
| 1438188_x_at | Slc25a29      | 1420622_a_at | Hspa8         | 1435292_at   | Tbc1d4        |
| 1424380_at   | Vps37b        | 1455741_a_at | Ece1          | 1439269_x_at | Mcm7          |
| 1423135_at   | Thy1          | 1423142_a_at | Gtpbp4        | 1454952_s_at | Ncapd3        |
| 1435534_a_at | Tomm20        | 1415965_at   | Scd1          | 1449705_x_at | Mcm3          |
| 1417293_at   | Hs6st1        | 1448158_at   | Sdc1          | 1456280_at   | Clspn         |
| 1448029_at   | Tbx3          | 1417398_at   | Rras2         | 1439012_a_at | Dck           |
| 1451072_a_at | Rnf4          | 1455398_at   | Lrrc8c        | 1448187_at   | Pold1         |
| 1451458_at   | Tmem2         | 1434054_at   | Mafg          | 1455654_at   | Hjurp         |
| 1450780_s_at | Hmga2         | 1435379_at   | Urb2          | 1417938_at   | Rad51ap1      |
| 1418033_s_at | Zkscan6       | 1437177_at   | Larp4         | 1436707_x_at | Ncaph         |
| 1425423_at   | Glis1         | 1437279_x_at | Sdc1          | 1453314_x_at | 2610039C10Rik |
| 1456702_x_at | Mat2a         | 1415943_at   | Sdc1          | 1435737_a_at | Nde1          |
| 1418432_at   | Cab39         | 1434304_s_at | Nus1          | 1438434_at   | Arhgap11a     |
| 1419209_at   | Cxcl1         | 1460672_at   | 2410002F23Rik | 1448369_at   | Pola2         |
| 1428457_at   | Ttpal         | 1433656_a_at | Gnl3          | 1415810_at   | Uhrf1         |
| 1437626_at   | Zfp3612       | 1415944_at   | Sdc1          | 1416802_a_at | Cdca5         |
| 1437635_at   | Debld2        | 1427893_a_at | Pmvk          | 1424511_at   | Aurka         |
| 1429897_a_at | D16Ert472e    | 1452209_at   | Pkp4          | 1421818_at   | Bel6          |
| 1426875_s_at | Srxn1         | 1424238_at   | Sirt7         | 1437251_at   | Cdca2         |
| 1422169_a_at | Bdnf          | 1450742_at   | Bysl          | 1423092_at   | Incenp        |
| 1423100_at   | Fos           | 1424333_at   | Rg9mtd1       | 1434699_at   | G2e3          |
| 1416881_at   | Mcl1          | 1420753_at   | Tll1          | 1428483_a_at | 2610039C10Rik |
| 1427033_at   | Dnmbp         | 1458126_at   | D030041H20Rik | 1419513_a_at | Ect2          |
| 1433804_at   | Jak1          | 1424051_at   | Col4a2        | 1439510_at   | Sgol1         |
| 1420024_s_at | Etf1          | 1434177_at   | Ece1          | 1448191_at   | Plk1          |
| 1422264_s_at | Klf9          | 1438802_at   | Foxp1         | 1443161_at   | ---           |
| 1424411_at   | Tmem189       | 1449029_at   | Mknk2         | 1439394_x_at | Cdc20         |
| 1448877_at   | Dlx2          | 1423392_at   | Clic4         | 1426349_s_at | Tmpo          |
| 1433899_x_at | Tsc22d1       | 1448413_at   | 2410016O06Rik | 1422628_at   | Fam111a       |
| 1442606_at   | ---           | 1454963_at   | Pde12         | 1452036_a_at | Tmpo          |
| 1446196_at   | Hmga2         | 1434200_at   | BC010981      | 1427094_at   | Pole2         |
| 1419486_at   | Foxc1         | 1452831_s_at | Ppat          | 1435597_at   | Atad5         |
| 1419647_a_at | Ier3          | 1442793_s_at | LOC100046166  | 1434700_at   | G2e3          |
| 1419642_at   | Purb          | 1450077_at   | Chd1          | 1441547_at   | ---           |
| 1451680_at   | Srxn1         | 1425921_a_at | 1810055G02Rik | 1424465_at   | Ccdc58        |
| 1428254_at   | Purb          | 1456590_x_at | Akr1b3        | 1424299_at   | Oma1          |
| 1435483_x_at | Slc25a32      | 1437223_s_at | Xbp1          | 1439695_a_at | Kif20b        |
| 1418220_at   | Foxf2         | 1419548_at   | Kpna1         | 1422513_at   | Ccnf          |
| 1428736_at   | Gramd3        | 1421140_a_at | Foxp1         | 1425734_a_at | Ccdc77        |
| 1420888_at   | Bcl2l1        | 1454795_at   | Cobll1        | 1417185_at   | Ly6a          |
| 1456022_at   | Hipk2         | 1423289_a_at | 1810029B16Rik | 1416069_at   | Pfkip         |
| 1423389_at   | Smad7         | 1416835_s_at | Amd1          | 1418443_at   | Xpo1          |
| 1432426_a_at | Ube2f         | 1449670_x_at | Gpr137b       | 1454694_a_at | Top2a         |
| 1429650_at   | Stk40         | 1429596_at   | Slc7a6os      | 1426942_at   | Aim1          |
| 1423481_at   | Riok2         | 1423566_a_at | Hsph1         | 1423627_at   | Nqo1          |

|                          |                            |                            |
|--------------------------|----------------------------|----------------------------|
| 1460378 a at Tes         | 1434744 at Yrdc            | 1439375 x at Aldoa         |
| 1442471_at ---           | 1456566_x_at Rbm14         | 1424555_at 9430015G10Rik   |
| 1436329_at Egr3          | 1425993 a at Hsph1         | 1437109_s at Lsm6          |
| 1449470_at Dlx1          | 1433962_at Trmt61a         | 1448627_s_at Pbk           |
| 1455102_at Larp4         | 1426286_at Noc3l           | 1450899_at Neddl           |
| 1444064_at Samhd1        | 1432059 x at 5031425E22Rik | 1417822_at D17H6S56E-5     |
| 1435128_at Baiap2        | 1436979_x_at Rbm14         | 1454743_at Nup205          |
| 1421134_at Areg          | 1431422 a at Dusp14        | 1419172_at Dhfr            |
| 1418014_a_at B4galt1     | 1415964_at Scd1            | 1452458_s_at Ppil5         |
| 1416086_at Tpst2         | 1450569_a at Rbm14         | 1417118_a_at Naa10         |
| 1423614_at Lrrc8c        | 1423904 a at Pvr           | 1423774 a at Prc1          |
| 1426937_at 6330406I15Rik | 1451828_a_at Acsl4         | 1424118_a_at Spc25         |
| 1449108_at Fdx1          | 1451649 a at Wdr75         | 1416309_at Nusap1          |
| 1460393_a_at Dusp7       | 1418226_at Orc2            | 1418649_at EglN3           |
| 1427114_at Ttc19         | 1455032_at Ccnyl1          | 1416757_at Zwilch          |
| 1457823_at Cyr61         | 1428694_at Mir17hg         | 1435836_at Pdk1            |
| 1439367_x_at Arf4        | 1428080_at Pgam5           | 1448635_at Smc2            |
| 1419640_at Purb          | 1439747_at Ptges           | 1435733_x_at Rnaseh2c      |
| 1439837_at Gigyf2        | 1448188_at Ucp2            | 1452242_at Cep55           |
| 1426691_at Tjap1         | 1425348_a at Srprb         | 1429658_a_at Smc2          |
| 1453582_at Chka          | 1416998_at Rrs1            | 1427707 a at Stil          |
| 1426567_a_at Pqlc1       | 1436541_at 2310008H09Rik   | 1433893_s_at Spag5         |
| 1458700_at ---           | 1450871_a_at Bcat1         | 1451077_at LOC100503670    |
| 1438386 x at Mat2a       | 1451278 a at Mettl11a      | 1452597_at 2310061C15Rik   |
| 1441855_x_at Cxcl1       | 1455958_s at Pptc7         | 1416214_at Mcm4            |
| 1442277_at Chka          | 1420011 s at Xbp1          | 1436808 x at Mcm5          |
| 1428535_at 9430020K01Rik | 1449505_at Kpna1           | 1429660_s_at Smc2          |
| 1455185_s_at Phf16       | 1448480_at Nip7            | 1415945_at Mcm5            |
| 1427084 a at Map4k5      | 1427997_at Ndufaf4         | 1449298 a at Pde1a         |
| 1457472_at Gigyf2        | 1416313_at Mllt11          | 1448225_at Gpaal           |
| 1430491 at Bop1          | 1435222 at Foxp1           | 1423714 at Asf1b           |
| 1452214_at Skil          | 1459741_x at Ucp2          | 1433408_a at Mcm10         |
| 1455191_x_at Pip5k1a     | 1417245_at Gpr180          | 1429273_at Bmper           |
| 1437566_at LOC100505087  | 1460563 at Nus1            | 1416251 at Mcm6            |
| 1416933_at Por           | 1436346_at Cd109           | 1452917_at Rfc5            |
| 1452009_at Ttc39b        | 1438677_at Pkp4            | 1452353_at Gpr155          |
| 1436125_at D16Ert472e    | 1416588_at Pptrn           | 1437580_s at Nek2          |
| 1445866_at Mast4         | 1428390_at Wdr43           | 1452659_at Dek             |
| 1449702_at Zfand2a       | 1421142 s at Foxp1         | 1452924 at Fam83d          |
| 1452008_at Ttc39b        | 1421141_a at Foxp1         | 1423920_at Ncaph           |
| 1444777_at Rai14         | 1449982_at Il11            | 1439377_x at Cdc20         |
| 1435226_at Rnf19b        | 1454733 at Nod1            | 1417458 s at Cks2          |
| 1448306_at Nfkb1a        | 1448782_at Txndc11         | 1433862_at Espl1           |
| 1449731 s at Nfkb1a      | 1418824 at Arf6            | 1430193 at Case5           |
| 1451163_at Tinf2         | 1424019_at Nop2            | 1448314_at Cdk1            |
| 1438658_a at Slpr3       | 1428869_at Nolc1           | 1422460_at Mad211          |
| 1432007 s at Ap2a2       | 1424475 at Camkk2          | 1417821 at D17H6S56E-5     |
| 1433891_at Lgr4          | 1430111_a at Bcat1         | 1424766_at Ercc61          |
| 1423694_at Kctd10        | 1420886 a at Xbp1          | 1433813 at Tmem48          |
| 1427998_at Lsm12         | 1426500_at Icmt            | 1448466_at Cdca5           |
| 1429144_at Gpcpd1        | 1435953_at Btaf1           | 1428519_at 2610528E23Rik   |
| 1428636_at Steap2        | 1456528 x at Ncl           | 1428480 at Cdca8           |
| 1416693_at Foxc2         | 1428844_a at Belaf1        | 1417910_at Ccna2           |
| 1442671 at ---           | 1419798 at 2610019E17Rik   | 1423847 at Ncapd2          |
| 1453851_a at Gadd45g     | 1423040_at Bzw1            | 1433725_at Acvr1b          |
| 1428288_at Klf9          | 1455195_at Rps24           | 1452314_at Kif11           |
| 1417168 a at Usp2        | 1423041 a at Bzw1          | 1424046 at Bub1            |
| 1439122_at Ddx6          | 1426987_at 5430417L22Rik   | 1449699_s at C330027C09Rik |

|              |               |              |               |              |               |
|--------------|---------------|--------------|---------------|--------------|---------------|
| 1423116_at   | Dom3z         | 1450845_a_at | Bzw1          | 1424136_a_at | LOC433064     |
| 1440678_at   | ---           | 1423522_at   | Npm3          | 1448205_at   | Ccnb1         |
| 1422612_at   | Hk2           | 1454524_at   | 2310075M01Rik | 1423748_at   | Pdk1          |
| 1440818_s_at | Sf3b1         | 1433883_at   | Tpm4          | 1428104_at   | Tpx2          |
| 1424735_at   | Slc25a25      | 1451160_s_at | Pvr           | 1435938_at   | Ckap2l        |
| 1449188_at   | Midn          | 1424191_a_at | Tmem41a       | 1423813_at   | Kif22         |
| 1434350_at   | Csrnp1        | 1442849_at   | Lrp1          | 1433643_at   | Cacna2d1      |
| 1424863_a_at | Hipk2         | 1421346_a_at | Slc6a6        | 1436723_at   | Cenpi         |
| 1450710_at   | Jarid2        | 1435280_at   | AI452195      | 1416383_a_at | Pcx           |
| 1420088_at   | Nfkbia        | 1458996_at   | Itga5         | 1423775_s_at | Prc1          |
| 1421031_a_at | 2310016C08Rik | 1423401_at   | Etv6          | 1449060_at   | Kif2c         |
| 1438157_s_at | Nfkbia        | 1437490_x_at | LOC640502     | 1442280_at   | D2Ertd750e    |
| 1448824_at   | Ube2j1        | 1423760_at   | Cd44          | 1452954_at   | Ube2c         |
| 1424836_a_at | Clasp2        | 1456516_x_at | LOC640502     | 1417933_at   | Igfbp6        |
| 1436584_at   | Spry2         | 1437271_at   | Cclf1         | 1421571_a_at | Ly6c1         |
| 1454617_at   | Arrdc3        | 1416756_at   | Dnajb1        | 1449966_s_at | Cab39l        |
| 1429114_at   | Sestd1        | 1437270_a_at | Cclf1         | AFFX-PyruCa  | Pcx           |
| 1444279_at   | Huwe1         | 1426871_at   | Fbxo33        | 1415936_at   | Bcar3         |
| 1439662_at   | Homer1        | 1454703_x_at | Snhg1         | 1428605_at   | Ccdc124       |
| 1455574_at   | Smg7          | 1417488_at   | Fosl1         | 1451110_at   | Egln1         |
| 1437363_at   | Homer1        | 1422243_at   | Fgf7          | 1442454_at   | Top2a         |
| 1419066_at   | Ier5l         | 1452416_at   | Il6ra         | 1416258_at   | Tk1           |
| 1457231_at   | ---           | 1417602_at   | Per2          | 1433543_at   | Anln          |
| 1434773_a_at | Slc2a1        | 1426958_at   | Rps9          | 1449061_a_at | Prim1         |
| 1426599_a_at | Slc2a1        | 1453269_at   | Unc5b         | 1425006_a_at | Vrk1          |
| 1417409_at   | Jun           | 1453840_at   | Pabpc1        | 1427161_at   | Cenpf         |
| 1416686_at   | Plod2         | 1437149_at   | Slc6a6        | 1424278_a_at | Birc5         |
| 1416687_at   | Plod2         | 1431037_a_at | Elavl1        | 1434911_s_at | Arhgap19      |
| 1426600_at   | Slc2a1        | 1452483_a_at | Cd44          | 1453924_a_at | Ptgr          |
| 1447339_at   | ---           | 1420990_at   | Chd1          | 1423463_a_at | D2Ertd750e    |
| 1458089_at   | ---           | 1452118_at   | Rrp1b         | 1419351_a_at | l7Rn6         |
| 1441799_at   | 6030422H21Rik | 1422591_at   | Tceb3         | 1451246_s_at | Aurkb         |
| 1427188_at   | Arih1         | 1446086_s_at | Gli2          | 1428900_s_at | Mett5d1       |
| 1427189_at   | Arih1         | 1437668_at   | Ccr1l         | 1450842_a_at | Cenpa         |
| 1417169_at   | Usp2          | 1418528_a_at | Dad1          | 1423396_at   | Agt           |
| 1428306_at   | Ddit4         | 1422844_a_at | Wdr77         | 1433685_a_at | 6430706D22Rik |
| 1418025_at   | Bhlhe40       | 1452091_a_at | Rbm28         | 1420081_s_at | D2Ertd750e    |
| 1436316_at   | Klf13         | 1424924_at   | Sec63         | 1439066_at   | Angpt1        |
| 1446497_at   | ---           | 1426618_a_at | Pomgnt1       | 1454920_at   | Uhrf2         |
| 1449138_at   | Sf3b1         | 1454860_x_at | Dad1          | 1428105_at   | Tpx2          |
| 1452179_at   | Phf17         | 1440272_at   | ---           | 1418184_at   | Cenpm         |
| 1437638_at   | Srrm2         | 1451026_at   | Ftsj3         | 1453769_at   | Ckap2l        |
| 1428697_at   | Dpp8          | 1421260_a_at | Srm           | 1417503_at   | Rfc2          |
| 1439198_at   | ---           | 1418963_at   | Fam188a       | 1450156_a_at | Hmmr          |
| 1427932_s_at | 1200003I10Rik | 1424926_at   | Sec63         | 1420776_a_at | Auh           |
| 1419639_at   | Efnb2         | 1428112_at   | Manf          | 1422016_a_at | Cenph         |
| 1435137_s_at | 1200015M12Rik | 1450735_at   | Pno1          | 1417450_a_at | Tacc3         |
| 1418571_at   | Tnfrsf12a     | 1423151_at   | Dnajb11       | 1427797_s_at | ---           |
| 1418572_x_at | Tnfrsf12a     | 1429191_at   | Dhx33         | 1456077_x_at | Cdc25c        |
| 1452418_at   | 1200016E24Rik | 1430138_at   | Cd3eap        | 1438009_at   | Gm11276       |
| 1420131_s_at | Pttglip       | 1417096_at   | Rrp15         | 1431506_s_at | Ppih          |
| 1418148_at   | Abhd1         | 1426932_at   | D19Bwg1357e   | 1417911_at   | Ccna2         |
| 1453238_s_at | 3930401B19Rik | 1456597_at   | Heatr3        | 1439040_at   | Cenpe         |
| 1417625_s_at | Cxcr7         | 1435656_at   | Gmps          | 1453226_at   | Kif18b        |
| 1449007_at   | Btg3          | 1416290_a_at | Psmc4         | 1417506_at   | Gmnn          |
| 1416531_at   | Gsto1         | 1457983_s_at | Rwdd4a        | 1429171_a_at | Ncapg         |
| 1441519_at   | Nid1          | 1439433_a_at | Slc35a2       | 1435306_a_at | Kif11         |
| 1419641_at   | Purb          | 1418131_at   | Samhd1        | 1452305_s_at | Cenpn         |

|            |    |            |            |    |               |            |    |          |
|------------|----|------------|------------|----|---------------|------------|----|----------|
| 1456036_x  | at | Gsto1      | 1417024    | at | Hars          | 1438091_a  | at | H2afz    |
| 1419181_at |    | Zfp326     | 1449221_a  | at | Rrbp1         | 1435005_at |    | Cenpe    |
| 1451463_at |    | Prr5       | 1452037_at |    | Mgat2         | 1418369_at |    | Prim1    |
| 1423260_at |    | Id4        | 1415828_a  | at | Serp1         | 1418281_at |    | Rad51    |
| 1415802_at |    | Slc16a1    | 1424243_at |    | Rwdd4a        | 1419467_at |    | Clec14a  |
| 1429204_at |    | Camk2n2    | 1416106_at |    | Kti12         | 1438214_at |    | Trps1    |
| 1440908_at |    | D030063E12 | 1435221_at |    | Foxp1         | 1438482_at |    | Wwp2     |
| 1451335_at |    | Plac8      | 1451293_at |    | Rrp9          | 1417926_at |    | Ncapg2   |
| 1423259_at |    | Id4        | 1416239_at |    | Ass1          | 1457445_at |    | Trps1    |
| 1439387_x  | at | Ctu2       | 1460704_at |    | Rfng          | 1423620_at |    | Cenpq    |
| 1442322_at |    | ---        | 1416852_a  | at | Ncdn          | 1456055_x  | at | Pold1    |
| 1416864_at |    | Surf6      | 1428228_at |    | Pgm3          | 1458374_at |    | C79407   |
| 1437342_x  | at | Pttg1ip    | 1426626_at |    | Gtf2f2        | 1416961_at |    | Bub1b    |
| 1452203_at |    | Obfc2a     | 1423239_at |    | Impdh1        | 1453053_at |    | Cenpw    |
| 1421854_at |    | Fgl2       | 1439459_x  | at | Acly          | 1416664_at |    | Cdc20    |
| 1416359_at |    | Snx18      | 1416485_at |    | Timm23        | 1438627_x  | at | Pgd      |
| 1425145_at |    | Il1rl1     | 1418872_at |    | Abcb1b        | 1418919_at |    | Sgol1    |
| 1451466_at |    | D16Ert472e | 1415725_at |    | Rrn3          | 1447363_s  | at | Bub1b    |
| 1422317_a  | at | Il1rl1     | 1423828_at |    | Fasn          | 1437370_at |    | Sgol2    |
| 1430623_s  | at | Obfc2a     | 1438922_x  | at | Slc25a5       | 1419943_s  | at | Ccnb1    |
| 1428219_at |    | Rybp       | 1418079_at |    | Psme3         | 1448899_s  | at | Rad51ap1 |
| 1447491_at |    | ---        | 1434517_at |    | Wdfy2         | 1437611_x  | at | Kif2c    |
| 1419728_at |    | Cxcl5      | 1452171_at |    | Grwd1         | 1451128_s  | at | Kif22    |
| 1420570_x  | at | Tcl1b3     | 1416423_x  | at | Ssb           | 1424156_at |    | Rbl1     |
| 1437711_x  | at | Odc1       | 1439279_at |    | 3110007F17Rik | 1425815_a  | at | Hmmr     |
| 1454846_at |    | Utp15      | 1426369_at |    | Far1          | 1417772_at |    | Grhpr    |
| 1436637_at |    | ---        | 1434287_at |    | Agpat5        | 1422814_at |    | Aspm     |
| 1448529_at |    | Thbd       | 1427980_at |    | 4933407C03Rik | 1428518_at |    | Mifl1ip  |
| 1455257_at |    | Itgb3      | 1415987_at |    | Hdlbp         | 1426580_at |    | Plk4     |
| 1455660_at |    | Csf2rb     | 1426371_at |    | Far1          | 1423747_a  | at | Pdk1     |
| 1437671_x  | at | Prss23     | 1426123_a  | at | Rrbp1         | 1419838_s  | at | Plk4     |
| 1431057_a  | at | Prss23     | 1450087_a  | at | Nolc1         | 1428481_s  | at | Cdca8    |
| 1421855_at |    | Fgl2       | 1438962_s  | at | Ddx31         | 1417457_at |    | Cks2     |
| 1417389_at |    | Gpc1       | 1428715_at |    | Gfpt1         | 1424128_x  | at | Aurkb    |
| 1416041_at |    | Sgk1       | 1438360_x  | at | Slc25a5       | 1449171_at |    | Ttk      |
| 1418492_at |    | Grem2      | 1455841_s  | at | Grwd1         | 1429150_at |    | Ccdc77   |
| 1441030_at |    | Rai14      | 1450506_a  | at | Aen           | 1424629_at |    | Brca1    |
| 1442679_at |    | ---        | 1428389_s  | at | Wdr43         | 1424971_at |    | Ccdc99   |
| 1451344_at |    | Tmem119    | 1428543_at |    | Ppat          | 1437716_x  | at | Kif22    |
| 1419638_at |    | Efnb2      | 1417511_at |    | Lyar          | 1434767_at |    | C79407   |
| 1421151_a  | at | Epha2      | 1448450_at |    | Ak2           | 1455730_at |    | Dlgap5   |
| 1416342_at |    | Tnc        | 1428783_at |    | Prkar2a       | 1416076_at |    | Ccnb1    |
| 1453345_at |    | Nipal1     | 1437033_a  | at | Skp2          | 1449207_a  | at | Kif20a   |
| 1458140_at |    | Slit2      | 1449211_at |    | Bpnt1         | 1455983_at |    | Cdca2    |
| 1418075_at |    | St6galnac4 | 1448251_at |    | 9030425E11Rik | 1416299_at |    | Shcbp1   |
| 1420380_at |    | Ccl2       | 1421038_a  | at | Kcnn4         | 1436847_s  | at | Cdca8    |
| 1448593_at |    | Wisp1      | 1455237_at |    | Usp36         | 1429295_s  | at | Trip13   |
| 1421228_at |    | Ccl7       | 1424001_at |    | Mki67ip       | 1429172_a  | at | Ncapg    |
| 1448594_at |    | Wisp1      | 1424522_at |    | Heatr1        | 1448953_at |    | Blm      |
| 1459622_at |    | Gm22       | 1434103_at |    | Slc35e1       | 1438161_s  | at | Rfc4     |
| 1434458_at |    | Fst        | 1448451_at |    | Ak2           | 1419076_a  | at | Brca2    |
| 1421365_at |    | Fst        | 1451199_at |    | Qtrtd1        | 1437313_x  | at | Hmgb2    |
| 1425155_x  | at | Csfl       | 1419163_s  | at | Dnajc3        | 1418334_at |    | Dbf4     |
| 1417394_at |    | Klf4       | 1416234_at |    | Lrrc59        | 1420349_at |    | Ptgfr    |
| 1426973_at |    | Gpr153     | 1437343_x  | at | Atad3a        | 1448650_a  | at | Pole     |
| 1437820_at |    | Foxs1      | 1434239_at |    | Rrp12         | 1416155_at |    | Hmgb3    |
| 1419309_at |    | Pdpn       | 1437478_s  | at | Efhd2         | 1426817_at |    | Mki67    |
| 1420664_s  | at | Procr      | 1419046_at |    | Brp16         | 1455990_at |    | Kif23    |



|              |               |              |               |              |               |
|--------------|---------------|--------------|---------------|--------------|---------------|
| 1454838_s_at | Pkdec         | 1423122_at   | Avp1l         | 1418264_at   | Cenpk         |
| 1450852_s_at | F2r           | 1435436_at   | Epas1         | 1428727_at   | Cep192        |
| 1429310_at   | Flrt3         | 1453727_at   | Esfl          | 1446331_at   | Ptgr          |
| 1417395_at   | Klf4          | 1428688_at   | Pdcd11        | 1434286_at   | Trps1         |
| 1452387_a_at | Amotl2        | 1426675_at   | Tomm70a       | 1452598_at   | Gins1         |
| 1443558_s_at | Nt5dc3        | 1448490_at   | Adck4         | 1449877_s_at | Kifc1         |
| 1449335_at   | Timp3         | 1426395_s_at | Eif3j         | 1416558_at   | Melk          |
| 1419089_at   | Timp3         | 1456865_x_at | Rrs1          | 1421963_a_at | Cdc25b        |
| 1424268_at   | Smox          | 1437630_at   | Lsg1          | 1452073_at   | Fam64a        |
| 1453102_at   | Flrt3         | 1448647_at   | Man2a1        | 1417800_at   | Parp2         |
| 1425154_a_at | Csfl          | 1419281_a_at | Zfp259        | 1416162_at   | Rad21         |
| 1456226_x_at | Ddr1          | 1423358_at   | Ece2          | 1417445_at   | Ndc80         |
| 1433842_at   | Lrrfip1       | 1418520_at   | Tgoln1        | 1424292_at   | Depdc1a       |
| 1429049_at   | Nuak2         | 1455242_at   | Foxp1         | 1433838_at   | Dars2         |
| 1427057_at   | Nt5dc3        | 1429363_at   | Vps37a        | 1443694_at   | Rgs20         |
| 1417045_at   | Bid           | 1416874_a_at | Paf1          | 1418380_at   | Terfl         |
| 1422705_at   | Pmepa1        | 1423884_at   | Cirh1a        | 1452197_at   | Smc4          |
| 1422706_at   | Pmepa1        | 1435690_at   | 2310008H09Rik | 1424955_at   | Haus1         |
| 1449405_at   | Tns1          | 1455330_at   | Nol9          | 1453107_s_at | 4933413G19Rik |
| 1424384_a_at | Znrf1         | 1424244_at   | Rwdd4a        | 1452534_a_at | Hmgb2         |
| 1444097_at   | Metrl         | 1424193_at   | Pwp2          | 1448622_at   | Lsm4          |
| 1427005_at   | Plk2          | 1450089_a_at | Srprb         | 1452040_a_at | Cdca3         |
| 1442107_at   | Flnb          | 1437359_at   | Rnps1         | 1427276_at   | Smc4          |
| 1452413_at   | C230081A13Rik | 1448704_s_at | H47           | 1419352_at   | I7Rn6         |
| 1418286_a_at | Efnb1         | 1423291_s_at | Hyoul         | 1434828_at   | Fam102b       |
| 1437700_at   | Schip1        | 1433505_a_at | Lrrc8d        | 1455033_at   | Fam102b       |
| 1424356_a_at | Metrl         | 1426350_at   | Mgat2         | 1455609_at   | Cit           |
| 1420979_at   | Pak1          | 1435735_x_at | H47           | 1438390_s_at | Pttg1         |
| 1441679_at   | ---           | 1428878_a_at | Pitpnc1       | 1419705_at   | Car5b         |
| 1449334_at   | Timp3         | 1452095_a_at | H47           | 1424105_a_at | Pttg1         |
| 1450970_at   | Got1          | 1435066_at   | Pitpnc1       | 1430574_at   | Cdkn3         |
| 1418424_at   | Tnfaip6       | 1455204_at   | Pitpnc1       | 1450920_at   | Ccnb2         |
| 1455667_at   | Preb          | 1434418_at   | Lass6         | 1429095_at   | Cenpp         |
| 1435580_at   | C230081A13Rik | 1417860_a_at | Spon2         | 1432361_a_at | Cenpp         |
| 1428909_at   | A130040M12Rik | 1455328_at   | Accn2         | 1431087_at   | Spc24         |
| 1422771_at   | Smad6         | 1421297_a_at | Cacnalc       | 1452621_at   | Pcbd2         |
| 1433605_at   | Inpp5a        | 1455157_a_at | Fam38a        | 1435575_at   | Kntc1         |
| 1433184_at   | 6720477C19Rik | 1455287_at   | Cdk6          | 1419153_at   | 2810417H13Rik |
| 1440999_at   | Zfp697        | 1427347_s_at | Tubb2a        | 1429156_at   | Cenpw         |
| 1434033_at   | Tle1          | 1424211_at   | Slc25a33      | 1426767_at   | Wdr90         |
| 1460411_s_at | Pkdec         | 1435338_at   | Cdk6          | 1432591_at   | Pappa         |
| 1424890_at   | Bnc1          | 1424529_s_at | Cgref1        | 1448145_at   | Wwp2          |
| 1448560_at   | Bid           | 1448596_at   | Slc6a8        | 1415849_s_at | Stmn1         |
| 1434694_at   | Lrrc8a        | 1450005_x_at | Dlk2          | 1456097_a_at | Itgb3bp       |
| 1435031_at   | Tmem120a      | 1416010_a_at | Ehd1          | 1448113_at   | Stmn1         |
| 1451596_a_at | Sphk1         | 1439030_at   | Gmppb         | 1444071_at   | 9630013A20Rik |
| 1456888_at   | Pfkfb4        | 1420807_a_at | Dlk2          | 1450692_at   | Kif4          |
| 1426625_at   | Zfp623        | 1448175_at   | Ehd1          | 1433604_x_at | Aldoa         |
| 1424801_at   | Enah          | 1455943_at   | Zfp451        | 1421546_a_at | Racgap1       |
| 1446245_at   | ---           | 1429298_at   | Ddah1         | 1427165_at   | Il13ra1       |
| 1440111_at   | ---           | 1416011_x_at | Ehd1          | 1450081_x_at | Gpi1          |
| 1455599_at   | Gfod1         | 1416360_at   | Snx18         | 1451932_a_at | Adamts14      |
| 1455002_at   | Ptp4a1        | 1460011_at   | Cyp26b1       | 1418442_at   | Xpo1          |
| 1452083_a_at | Pja1          | 1455924_at   | Rab6b         | 1424991_s_at | Tyms          |
| 1418350_at   | Hbegf         | 1454841_at   | Urb1          | 1439453_x_at | Rnaseh2c      |
| 1415803_at   | Cx3cl1        | 1431074_a_at | Pitpnc1       | 1417427_at   | Rnaseh2c      |
| 1444340_at   | C230066G23Rik | 1438317_a_at | Endog         | 1417971_at   | Nrm           |
| 1430125_s_at | Pqlc1         | 1452579_at   | Iscu          | 1451358_a_at | Racgap1       |

|                          |                          |                          |
|--------------------------|--------------------------|--------------------------|
| 1450850 at Ezr           | 1420808 at Gm6768        | 1449191 at Wfdc12        |
| 1423571_at S1pr1         | 1459740_s_at Ucp2        | 1445443_at ---           |
| 1428851 at 1300014I06Rik | 1420501 at Dnajc1        | 1427105_at Cenpn         |
| 1438375_at Fbln2         | 1452414_s_at Ccdc86      | 1418152_at Hmgn5         |
| 1422053_at Inhba         | 1416191_at Sec61a1       | 1422948_s_at Gm11275     |
| 1426449 a at Pja1        | 1455476 a at Gsel        | 1454909 at Tacc1         |
| 1459457_at Camk2d        | 1420646_at Nus1          | 1425668_a_at St3gal4     |
| 1420760 s at Ndrgr1      | 1457279 at LOC100504040  | 1437218 at Fn1           |
| 1442194_at AU018552      | 1427464_s_at Hspa5       | 1426397_at Tgfbr2        |
| 1437481_at Trmt61b       | 1423192_at Pspcl         | 1452540_a_at Gm11277     |
| 1459728 at Isy1          | 1454197 a at Ccdc86      | 1451069 at Pim3          |
| 1446481_at ---           | 1449660_s_at Coro1c      | 1430030_at 5330426P16Rik |
| 1450214 at Adora2b       | 1455173 at Gspt1         | 1418719 at Haus8         |
| 1449857_at 1200011I18Rik | 1442569_at ---           | 1419397_at Pola1         |
| 1421811_at Thbs1         | 1426471_at Zfp52         | 1435753_a_at Nucks1      |
| 1450931 at Dock9         | 1428273 at Abhd13        | 1455887 at Alg8          |
| 1419706_a_at Akap12      | 1455400_at Ddah1         | 1422470_at Bnip3         |
| 1424923_at Serpina3g     | 1433506_at Lrrc8d        | 1451263_a_at Fabp4       |
| 1460302 at Thbs1         | 1417400 at Rai14         | 1437100 x at Pim3        |
| 1442434_at D8Ertd82e     | 1419456_at Dcxr          | 1417023_a_at Fabp4       |
| 1433454 at Abtb2         | 1415827 a at Serp1       | 1453416 at Gas2l3        |
| 1444028_s_at Dock9       | 1454995_at Ddah1         | 1446951_at P4ha3         |
| 1422818_at Nedd9         | 1451339_at Suox          | 1418072_at Hist1h2bc     |
| 1434285 at Frmd4a        | 1449870 a at Atp6v0a2    | 1416613 at Cyp1b1        |
| 1450932_s_at Dock9       | 1424322_at Apex2         | 1457035_at AI607873      |
| 1457297 at A430081F14Rik | 1433733 a at Cry1        | 1417923 at Pak3          |
| 1442223_at Enah          | 1435935_at 2410131K14Rik | 1459902_at 2700007P21Rik |
| 1438673_at Slc4a7        | 1423223_a at Prdx6       | 1438988_x_at Hn1         |
| 1417612 at Ier5          | 1422678 at Dgat2         | 1456808 at ---           |
| 1416953_at Ctgf          | 1452521_a at Plaur       | 1419006_s_at Peli2       |
| 1440831 at Bach1         | 1426756 at Galnt2        | 1425379 at Hgf           |
| 1438824_at Slc20a1       | 1423957_at Aen           |                          |
| 1426448_at Pja1          | 1458847_at ---           |                          |
| 1457053 at ---           | 1423501 at Max           |                          |
| 1452445_at Slc41a2       | 1434104_at Slc35e1       |                          |
| 1450377_at Thbs1         | 1437500_at Noc3l         |                          |
| 1441663_at ---           | 1437859_x at Eif5a       |                          |
| 1416250_at Btg2          | 1416606_s at Nhp2        |                          |
| 1448914 a at Csf1        | 1416015 s at Abce1       |                          |
| 1433453_a at Abtb2       | 1417724_at Thoc4         |                          |
| 1438417_at Pwwp2b        | 1454976_at Sod2          |                          |
| 1419879 s at Trim25      | 1415771 at Ncl           |                          |
| 1422785_at Rasa2         | 1423756_s at Igfbp4      |                          |
| 1417790 at Dok1          | 1415800 at Gja1          |                          |
| 1417342_at Ppp1r2        | 1437992_x at Gja1        |                          |
| 1417434_at Gpd2          | 1423398_at Taf12         |                          |
| 1416156 at Vcl           | 1439439 x at Eef1d       |                          |
| 1456160_at ---           | 1416563_at Ctps          |                          |
| 1438783 at ---           | 1452915 at Prkar2a       |                          |
| 1448568_a at Slc20a1     | 1416973_at Nhp2l1        |                          |
| 1448684_at Ppp1r2        | 1426946_at Ipo5          |                          |
| 1423025 a at Iqcj-schip1 | 1431893 a at Pdss1       |                          |
| 1418285_at Efnb1         | 1415773_at Ncl           |                          |
| 1417341 a at Ppp1r2      | 1452439 s at Srsf2       |                          |
| 1415797_at Ddr1          | 1416147_at Hspa4         |                          |
| 1451591_a at Efnb1       | 1428788_at Pgp           |                          |
| 1460220 a at Csf1        | 1430982 at Srsf1         |                          |
| 1457492_at Trio          | 1455482_at Ap2a2         |                          |

|              |               |              |               |
|--------------|---------------|--------------|---------------|
| 1455862_at   | Ubtd2         | 1452753_at   | Foxk2         |
| 1418730_at   | Rlim          | 1448178_a_at | Cct3          |
| 1445534_at   | Flnb          | 1454640_at   | Chchd7        |
| 1433768_at   | Palld         | 1460247_a_at | Skp2          |
| 1427228_at   | Palld         | 1416024_x_at | Cct3          |
| 1448272_at   | Btg2          | 1448192_s_at | Gm5081        |
| 1439556_at   | Ncam1         | 1460691_at   | Zfp598        |
| 1429693_at   | Dab2          | 1456383_at   | Rsl1d1        |
| 1420498_a_at | Dab2          | 1428484_at   | Osbp13        |
| 1429783_at   | Pdlim5        | 1448707_at   | Taf13         |
| 1415758_at   | Fry1          | 1433746_at   | Wdr3          |
| 1436551_at   | Fgfr1         | 1423403_at   | Mapkbp1       |
| 1450229_at   | Med14         | 1416685_s_at | Fbl           |
| 1437061_at   | Mbd1          | 1434543_a_at | Bola2         |
| 1421413_a_at | Pdlim5        | 1423456_at   | Bzw2          |
| 1457637_at   | ---           | 1440051_at   | ---           |
| 1416303_at   | Litaf         | 1415754_at   | Polr2f        |
| 1452741_s_at | Gpd2          | 1448469_at   | Nid1          |
| 1441114_at   | 9330156P08Rik | 1415807_s_at | Srsf2         |
| 1429487_at   | Ppp1r12a      | 1433952_at   | Tufm          |
| 1425811_a_at | Csrp1         | 1421945_a_at | Rpf2          |
| 1435542_s_at | Ctnnbp2nl     | 1422993_s_at | Refbp2        |
| 1442919_at   | Sh3pxd2b      | 1448947_at   | 2810004N23Rik |
| 1437734_at   | Ppp1r12a      | 1435536_at   | Ddi2          |
| 1444992_at   | AI120166      | 1416605_at   | Nhp2          |
| 1434181_at   | Fermt2        | 1421491_a_at | Tmem49        |
| 1448419_at   | Pop4          | 1433599_at   | Baz1a         |
| 1447612_x_at | Kdm6b         | 1448677_at   | Cox4nb        |
| 1455179_at   | Mpp7          | 1416706_at   | Rpe           |
| 1418135_at   | Aff1          | 1460667_at   | U90926        |
| 1438781_at   | Tet2          | 1451833_a_at | Setdb1        |
| 1419583_at   | Cbx4          | 1433766_at   | Naa25         |
| 1435133_at   | Ugcg          | 1433567_at   | Gmps          |
| 1449773_s_at | Gadd45b       | 1450401_at   | Tgs1          |
| 1429639_at   | Gpcpd1        | 1418024_at   | Naa15         |
| 1425514_at   | Pik3r1        | 1416705_at   | Rpe           |
| 1438725_at   | Med13         | 1415699_a_at | Gps1          |
| 1440443_at   | E030016H06Rik | 1428163_at   | Sar1b         |
| 1432216_s_at | Mpp7          | 1432016_a_at | Idh3a         |
| 1435867_at   | Jhdm1d        | 1435372_a_at | Pa2g4         |
| 1436498_at   | Arih1         | 1423264_at   | Bop1          |
| 1434180_at   | Fermt2        | 1417764_at   | Ssr1          |
| 1456386_at   | ---           | 1426674_at   | Eif3b         |
| 1454158_at   | Mpp7          | 1428870_at   | Nolc1         |
| 1459917_at   | Ggnbp2        | 1420491_at   | Eif2s1        |
| 1455166_at   | Arl5b         | 1438510_a_at | Hars          |
| 1418892_at   | Rhoj          | 1438178_x_at | Atad3a        |
| 1417329_at   | Slc23a2       | 1448604_at   | Uck2          |
| 1440179_x_at | Rnf217        | 1418969_at   | Skp2          |
| 1437741_at   | Rab21         | 1452012_a_at | Exosc1        |
| 1450026_a_at | B3gnt2        | 1423796_at   | Sfpq          |
| 1437884_at   | Arl5b         | 1416939_at   | Ppa1          |
| 1418936_at   | Maff          | 1456541_x_at | Atad3a        |
| 1454707_at   | 2310035C23Rik | 1438910_a_at | Stom          |
| 1450744_at   | Ell2          | 1435333_at   | Nduf4f4       |
| 1423161_s_at | Spred1        | 1426290_at   | Dimt1         |
| 1444651_at   | LOC553089     | 1448230_at   | Usp10         |
| 1436305_at   | Rnf217        | 1428069_at   | Cdca7         |

|              |               |              |               |
|--------------|---------------|--------------|---------------|
| 1447240_at   | ---           | 1417233_at   | Chchd4        |
| 1436977_at   | ---           | 1420867_at   | Tmed2         |
| 1417357_at   | Emd           | 1416345_at   | Timm8a1       |
| 1459911_at   | Cdr21         | 1455261_at   | Luc7l         |
| 1451041_at   | Rock2         | 1433467_at   | Slc7a6        |
| 1429251_at   | LOC100503505  | 1451296_x_at | Pabpc4        |
| 1458739_at   | ---           | 1434545_x_at | Bola2         |
| 1423306_at   | 2010002N04Rik | 1431802_a_at | Ept1          |
| 1415840_at   | Elov15        | 1426609_at   | Dis3          |
| 1437211_x_at | Elov15        | 1421528_a_at | Med22         |
| 1437396_at   | Creb3l2       | 1426579_at   | Gnl2          |
| 1422698_s_at | Jarid2        | 1451753_at   | Plxna2        |
| 1434080_at   | Aebp2         | 1417235_at   | Ehd3          |
| 1455876_at   | Slc4a7        | 1438938_x_at | Phb2          |
| 1438061_at   | 4930523C07Rik | 1422461_at   | Atad3a        |
| 1416543_at   | Nfe2l2        | 1416267_at   | Scoc          |
| 1434966_at   | Sfswap        | 1452829_at   | Cad           |
| 1436763_a_at | Klf9          | 1418775_at   | AI837181      |
| 1440671_at   | A130012E19Rik | 1437032_x_at | Rbm14         |
| 1430043_at   | Ttc19         | 1416020_a_at | Atp5g1        |
| 1430407_at   | 3110035C09Rik | 1418222_at   | 2610024G14Rik |
| 1451612_at   | Mt1           | 1449372_at   | Dnajc3        |
| 1426415_a_at | Trim25        | 1426909_at   | Uck2          |
| 1457268_at   | Dot1l         | 1415750_at   | Tbl3          |
| 1453283_at   | Pgm1          | 1426496_at   | Wdr55         |
| 1419655_at   | Tle3          | 1416791_a_at | Nxf1          |
| 1416304_at   | Litaf         | 1434438_at   | Samhd1        |
| 1418970_a_at | Bcl10         | 1434524_at   | Eif2b3        |
| 1448587_at   | Tbc1d10a      | 1448144_at   | Hnrnpab       |
| 1452352_at   | Ctla2b        | 1433887_at   | Dnajc3        |
| 1428083_at   | Neat1         | 1422497_at   | Slc30a5       |
| 1420640_at   | Jmy           | 1455174_at   | Rps19bp1      |
| 1455300_at   | Tet2          | 1424161_at   | Ddx27         |
| 1424750_at   | Zbtb1         | 1448968_at   | Ubfd1         |
| 1418971_x_at | Bcl10         | 1424436_at   | Gart          |
| 1423160_at   | Spred1        | 1450965_at   | Tex261        |
| 1418324_at   | Fem1b         | 1416059_at   | Sec23b        |
| 1419654_at   | Tle3          | 1421012_at   | Srprb         |
| 1442248_at   | ---           | 1434544_at   | Bola2         |
| 1424644_at   | Tbcc          | 1434235_at   | Slc20a2       |
| 1445027_at   | Cdr21         | 1428374_at   | Glee          |
| 1443027_at   | ---           | 1423290_at   | Hyoul         |
| 1424050_s_at | Fgfr1         | 1452754_at   | Creld2        |
| 1424027_at   | Pxn           | 1416362_a_at | Fkbp4         |
| 1427199_at   | Fryl          | 1452878_at   | Prkce         |
| 1425911_a_at | Fgfr1         | 1428315_at   | Ebna1bp2      |
| 1436801_x_at | Cdc42ep4      | 1426676_s_at | Tomm70a       |
| 1418323_at   | Fem1b         | 1448132_at   | Slc19a1       |
| 1456135_s_at | Pxn           | 1460433_at   | Entpd6        |
| 1437900_at   | 4930523C07Rik | 1417873_at   | Pwp1          |
| 1418295_s_at | Dgat1         | 1420138_at   | Slc19a1       |
| 1431299_a_at | 2310014H01Rik | 1437471_at   | Lrrc45        |
| 1433494_at   | Dos           | 1459987_s_at | Cet3          |
| 1452837_at   | Lpin2         | 1416068_at   | Kars          |
| 1438370_x_at | Dos           | 1417192_at   | Tomm70a       |
| 1449311_at   | Bach1         | 1451262_a_at | Aimp2         |
| 1425576_at   | Ahcyl1        | 1426931_s_at | D19Bwg1357e   |
| 1418145_at   | Tfip11        | 1456396_at   | ---           |

|              |               |              |               |
|--------------|---------------|--------------|---------------|
| 1455616_at   | Aebp2         | 1434173_s_at | D19Bwg1357e   |
| 1456344_at   | Tnc           | 1430999_a_at | Scoc          |
| 1457528_at   | Slc4a7        | 1449645_s_at | Cct3          |
| 1433634_at   | Irf2bp2       | 1416890_at   | Wdr74         |
| 1442359_at   | Steap2        | 1441788_s_at | Dkc1          |
| 1456150_at   | Jhdm1d        | 1456523_at   | Gm2115        |
| 1423622_a_at | Ccnl1         | 1420497_a_at | Cebpz         |
| 1425640_at   | Aff1          | 1416684_at   | Fbl           |
| 1457167_at   | Med14         | 1417053_at   | Phb           |
| 1432478_a_at | Rnf19b        | 1438853_x_at | Ddx54         |
| 1422931_at   | Fosl2         | 1415710_at   | Cox18         |
| 1416432_at   | Pfkfb3        | 1454814_s_at | Gm5081        |
| 1418256_at   | Srf           | 1416052_at   | Prps1         |
| 1446167_at   | ---           | 1453257_at   | Agpat5        |
| 1427359_at   | Jhdm1d        | 1416346_at   | Timm8a1       |
| 1437173_at   | S1pr3         | 1451170_s_at | Nomo1         |
| 1431162_a_at | Enah          | 1439740_s_at | Uck2          |
| 1433542_at   | Inpp5f        | 1417057_a_at | Lamp3         |
| 1431256_at   | 5033423O07Rik | 1417725_a_at | Sssca1        |
| 1419247_at   | Rgs2          | 1460730_at   | Eif2b1        |
| 1419248_at   | Rgs2          | 1417692_at   | Drg2          |
| 1447830_s_at | Rgs2          | 1434710_at   | Dhx29         |
| 1424748_at   | Galnt11       | 1438016_at   | Dkc1          |
| 1428164_at   | Nudt9         | 1415916_a_at | Mthfd1        |
| 1459253_at   | 1700023H06Rik | 1438168_x_at | Ddx39         |
| 1457276_at   | Sik2          | 1419097_a_at | Stom          |
| 1448694_at   | Jun           | 1416931_at   | Nif3l1        |
| 1432686_at   | 4833406M21Rik | 1432211_a_at | Fbxo9         |
| 1419874_x_at | Zbtb16        | 1416421_a_at | Ssb           |
| 1436338_at   | ---           | 1435057_x_at | Polr1e        |
| 1418678_at   | Has2          | 1424323_at   | Noc2l         |
| 1427061_at   | Rbbp8         | 1448315_a_at | Pycr2         |
| 1422946_a_at | Dnmt1         | 1451169_at   | Nomo1         |
| 1449169_at   | Has2          | 1436310_at   | Gemin5        |
| 1424212_at   | 9430023L20Rik | 1424151_at   | Aimp2         |
| 1430362_at   | 5730409N24Rik | 1438015_at   | Dkc1          |
| 1425255_s_at | Hnrpll        | 1417657_s_at | Dnajc2        |
| 1439163_at   | Zbtb16        | 1416792_at   | Ppm1g         |
| 1442025_a_at | ---           | 1422455_s_at | Nsf           |
| 1435122_x_at | Dnmt1         | 1434681_at   | Txlng         |
| 1459289_at   | ---           | 1450400_at   | Tgs1          |
| 1424613_at   | Gprc5b        | 1423060_at   | Pa2g4         |
| 1420965_a_at | Enc1          | 1435244_at   | Vav2          |
| 1417947_at   | Pcna          | 1448907_at   | Thop1         |
| 1450061_at   | Enc1          | 1450724_at   | Fam126a       |
| 1457404_at   | Nfkbiz        | 1428106_at   | 1300001I01Rik |
| 1418133_at   | Bcl3          | 1448126_at   | Fam60a        |
| 1434603_at   | Med13l        | 1424620_at   | Nop16         |
| 1434602_at   | Med13l        | 1426118_a_at | Tomm40        |
| 1435460_at   | Prkg2         | 1448794_s_at | Dnajc2        |
| 1451411_at   | Gprc5b        | 1417807_at   | Ufsp1         |
| 1427035_at   | Slc39a14      | 1416038_at   | Snd1          |
| 1448728_a_at | Nfkbiz        | 1434243_s_at | Tomm70a       |
| 1429758_at   | 1700017B05Rik | 1452830_s_at | Cad           |
| 1438660_at   | Gcnt2         | 1419058_at   | Polr1e        |
| 1429399_at   | Rnf125        | 1435985_at   | Farp2         |
| 1458989_at   | ---           | 1455060_at   | G3bp1         |
| 1435589_at   | Ccdc85b       | 1426631_at   | Pus7          |

|              |               |              |          |
|--------------|---------------|--------------|----------|
| 1435084_at   | C730049O14Rik | 1425820_x_at | Gpatch4  |
| 1442700_at   | Pde4b         | 1454817_at   | Utp18    |
| 1447877_x_at | Dnmt1         | 1429092_at   | Vkorc111 |
| 1447063_at   | 1700017B05Rik | 1435076_at   | Fam57a   |
|              |               | 1424533_a_at | Ccdc137  |
|              |               | 1452429_s_at | Abcf1    |
|              |               | 1448582_at   | Ctnnb1   |
|              |               | 1449001_at   | Ivd      |
|              |               | 1455787_x_at | Minpp1   |
|              |               | 1454142_a_at | Pwp1     |
|              |               | 1424659_at   | Slit2    |
|              |               | 1415733_a_at | Tomm5    |
|              |               | 1421160_a_at | Rfng     |
|              |               | 1425561_at   | Trnt1    |
|              |               | 1418057_at   | Tiam1    |
|              |               | 1449886_a_at | Timm9    |
|              |               | 1452048_at   | Mrpl12   |
|              |               | 1416750_at   | Sigmar1  |
|              |               | 1416448_at   | Itpa     |
|              |               | 1438650_x_at | Gja1     |
|              |               | 1454904_at   | Mtm1     |
|              |               | 1451166_a_at | Ccdc101  |
|              |               | 1434537_at   | Slco3a1  |
|              |               | 1423643_at   | Ddx39    |
|              |               | 1423334_at   | Ergic1   |
|              |               | 1429456_a_at | Polr3e   |
|              |               | 1423333_at   | Ergic1   |
|              |               | 1455832_a_at | Umps     |
|              |               | 1417775_at   | Polr1a   |
|              |               | 1416400_at   | Pycrl    |
|              |               | 1433663_s_at | Ncbp1    |
|              |               | 1417236_at   | Ehd3     |
|              |               | 1447903_x_at | Ap1s2    |
|              |               | 1456653_a_at | Mthfd11  |
|              |               | 1443794_x_at | Noc4l    |
|              |               | 1416014_at   | Abce1    |
|              |               | 1452657_at   | Ap1s2    |
|              |               | 1441327_a_at | Ssr1     |
|              |               | 1417193_at   | Sod2     |
|              |               | 1434222_at   | Sipa111  |
|              |               | 1427305_at   | Piga     |
|              |               | 1418509_at   | Cbr2     |
|              |               | 1452919_a_at | Pgp      |
|              |               | 1448610_a_at | Sod2     |
|              |               | 1424459_at   | Lpcat1   |
|              |               | 1425497_a_at | Prpf4b   |
|              |               | 1423241_a_at | Tfdp1    |
|              |               | 1416962_at   | Rcc1     |
|              |               | 1438095_x_at | Noc4l    |
|              |               | 1423371_at   | Pole4    |
|              |               | 1416730_at   | Rcl1     |
|              |               | 1423709_s_at | Farsb    |
|              |               | 1419680_a_at | Elac2    |
|              |               | 1417890_at   | Pdyp     |
|              |               | 1455655_a_at | Tardbp   |
|              |               | 1448633_at   | Prpf31   |
|              |               | 1450854_at   | Pa2g4    |
|              |               | 1422482_at   | Ruvbl2   |

|         |       |               |
|---------|-------|---------------|
| 1424140 | at    | Gale          |
| 1440299 | _at   | E330016A19Rik |
| 1420142 | s at  | Pa2g4         |
| 1457281 | _at   | Dnajc21       |
| 1428506 | _at   | Atic          |
| 1423633 | at    | Snrnp48       |
| 1418030 | _at   | Slco3a1       |
| 1450848 | at    | Dap3          |
| 1449140 | _at   | Nudcd2        |
| 1428476 | _a_at | Elac2         |
| 1416445 | at    | Fam98a        |
| 1451347 | _at   | Ino80e        |
| 1422753 | a at  | Polr3k        |
| 1428477 | _at   | Elac2         |
| 1426513 | _at   | Rbm28         |
| 1422796 | at    | Prep          |
| 1415917 | _at   | Mthfd1        |
| 1416283 | _at   | Gart          |
| 1425830 | a at  | Cinp          |
| 1448918 | _at   | Slco3a1       |
| 1439266 | a at  | Polr3k        |
| 1423723 | _s_at | Tardbp        |
| 1415772 | _at   | Ncl           |
| 1451956 | a at  | Sigmar1       |
| 1433748 | _at   | Zdhhc18       |
| 1440799 | s at  | Farp2         |
| 1424147 | _at   | Ahsa1         |
| 1438376 | _s_at | Trim27        |
| 1437520 | a at  | Nup85         |
| 1437828 | _s_at | Wdr46         |
| 1422456 | at    | Nsf           |
| 1424907 | _a_at | Farsa         |
| 1416376 | _at   | Tmem97        |
| 1423430 | at    | Mybbp1a       |
| 1449040 | _a_at | Sephs2        |
| 1456375 | _x_at | Trim27        |
| 1426607 | _at   | Gm7120        |
| 1424203 | _at   | Ncln          |
| 1424314 | at    | Prpf3         |
| 1417581 | _at   | Dhodh         |
| 1434221 | _at   | Mical3        |
| 1460215 | at    | Polr1a        |
| 1422489 | _at   | Mogs          |
| 1426727 | s at  | Gm8801        |
| 1460241 | _a_at | St3gal5       |
| 1428800 | _a_at | Pus7l         |
| 1423740 | a at  | Rbm10         |
| 1442590 | _at   | Tnfrsf22      |
| 1426726 | at    | Gm8801        |
| 1434859 | _at   | Umps          |
| 1457083 | _at   | ---           |
| 1437067 | at    | Phtf2         |
| 1426933 | _at   | Oxsr1         |
| 1439516 | at    | 2610201A13Rik |
| 1422709 | _a_at | Wdr46         |
| 1416915 | _at   | Msh6          |
| 1416492 | at    | Ccne1         |
| 1460444 | _at   | Arrb1         |

|         |       |               |
|---------|-------|---------------|
| 1419359 | at    | Hexim1        |
| 1425498 | _at   | Prpf4b        |
| 1417582 | s at  | Dhodh         |
| 1452811 | _at   | Atic          |
| 1417191 | _at   | Dnajb9        |
| 1439407 | x at  | Tagln2        |
| 1417420 | _at   | Ccnd1         |
| 1448698 | at    | Ccnd1         |
| 1417419 | _at   | Ccnd1         |
| 1435928 | _at   | 6430548M08Rik |
| 1425896 | a at  | Fbn1          |
| 1434830 | _at   | Mxd1          |
| 1419550 | a at  | Stk39         |
| 1460208 | _at   | Fbn1          |
| 1426074 | _at   | ---           |
| 1437274 | at    | Copa          |
| 1429772 | _at   | Plxna2        |
| 1434512 | _x at | Srsf3         |
| 1434791 | at    | Atp6v0a2      |
| 1430515 | _s at | Aasdhpt       |
| 1432164 | a at  | Gesh          |
| 1434135 | _at   | B3galnt2      |
| 1433751 | _at   | Slc39a10      |
| 1452768 | at    | Tex261        |
| 1443870 | _at   | Abcc4         |
| 1448691 | at    | Ubqln4        |
| 1416126 | _at   | Polr1b        |
| 1437373 | _at   | Aen           |
| 1448769 | at    | Slc35b1       |
| 1426940 | _at   | Sidt2         |
| 1454842 | a at  | B3galnt2      |
| 1433496 | _at   | Glt25d1       |
| 1459842 | _x at | Nubp2         |
| 1440303 | at    | Slc7a6os      |
| 1428820 | _at   | Mapre1        |
| 1448563 | _at   | Phb           |
| 1434552 | _at   | Wdr77         |
| 1418206 | _at   | Sdf211        |
| 1448646 | at    | Wdr12         |
| 1434940 | _x at | Rgs19         |
| 1454659 | _at   | Dctd          |
| 1417212 | at    | Fam195a       |
| 1423621 | _a at | Slc33a1       |
| 1452872 | at    | Ank3          |



**Echinomycin inhibits adipogenesis in 3T3-L1 cells in a HIF-independent manner**  
**Junna Yamaguchi, Tetsuhiro Tanaka, Hisako Saito, Seitaro Nomura, Hiroyuki Aburatani,**  
**Hironori Waki, Takashi Kadowaki, Masaomi Nangaku**

**Table S2. The list of 111 probes in the microarray analysis**  
**(upregulated with MDI and suppressed with echinomycin both at 2 and 6 hr)**

| <b>Probe Set ID</b> | <b>Gene Symbol</b> |
|---------------------|--------------------|
| 1450714_at          | Azin1              |
| 1428393_at          | Nrn1               |
| 1427844_a_at        | Cebpb              |
| 1437247_at          | Fosl2              |
| 1417483_at          | Nfkbiz             |
| 1424938_at          | Steap1             |
| 1451532_s_at        | Steap1             |
| 1449851_at          | Per1               |
| 1416881_at          | Mcl1               |
| 1456702_x_at        | Mat2a              |
| 1429758_at          | 1700017B05Rik      |
| 1455870_at          | Akap2              |
| 1437742_at          | Rab21              |
| 1418220_at          | Foxf2              |
| 1420888_at          | Bcl2l1             |
| 1426825_at          | Fmn13              |
| 1422264_s_at        | Klf9               |
| 1429399_at          | Rnf125             |
| 1417902_at          | Slc19a2            |
| 1449169_at          | Has2               |
| 1422612_at          | Hk2                |
| 1435483_x_at        | Slc25a32           |
| 1418678_at          | Has2               |
| 1427931_s_at        | Pdxk               |
| 1427930_at          | Pdxk               |
| 1417487_at          | Fosl1              |
| 1422851_at          | Hmga2              |
| 1442213_at          | LOC552908          |
| 1439168_at          | Camk2d             |
| 1450780_s_at        | Hmga2              |
| 1416743_at          | LOC640502 /// Uap1 |
| 1416125_at          | Fkbp5              |
| 1450781_at          | Hmga2              |
| 1418946_at          | St3gal1            |
| 1422751_at          | Tle1               |
| 1437490_x_at        | LOC640502 /// Uap1 |
| 1456516_x_at        | LOC640502 /// Uap1 |
| 1416745_x_at        | LOC640502          |
| 1423401_at          | Etv6               |
| 1448689_at          | Rras2              |
| 1416744_at          | LOC640502          |
| 1433531_at          | Acsl4              |
| 1434602_at          | Med13l             |
| 1430623_s_at        | Obfc2a             |
| 1435280_at          | AI452195           |
| 1426337_a_at        | Tead4              |
| 1418175_at          | Vdr                |
| 1437635_at          | Dcbld2             |
| 1457404_at          | Nfkbiz             |
| 1434967_at          | Zswim6             |
| 1455660_at          | Csf2rb             |

1434261 at Sipal12  
1447063\_at 1700017B05Rik  
1419766 at Sik1  
1444064\_at Samhd1  
1430362\_at 5730409N24Rik  
1423267\_s at Itga5  
1459722\_at Zswim6  
1424296 at Gclc  
1418911\_s\_at Acsl4  
1434384\_at Nrip1  
1425423 at Glis1  
1418879\_at Fam110c  
1418176 at Vdr  
1422771\_at Smad6  
1439163\_at Zbtb16  
1441030 at Rai14  
1455959\_s\_at Gclc  
1448231\_at Fkbp5  
1420150 at Spsb1  
1424613\_at Gprc5b  
1449089 at Nrip1  
1417621\_at Nfatc1  
1441823\_at Zmiz1  
1451739 at Klf5  
1418469\_at Nrip1  
1418901 at Cebpb  
1448728\_a\_at Nfkbiz  
1451021\_a\_at Klf5  
1439797 at Ppard  
1448029\_at Tbx3  
1430352 at Adamts9  
1437626\_at Zfp3612  
1427114\_at Ttc19  
1457276 at Sik2  
1451819\_at Zswim6  
1451177\_at Dnajb4  
1431734\_a\_at Dnajb4  
1435084\_at C730049O14Rik  
1439279 at 3110007F17Rik  
1455904\_at Gas5 /// Snord47  
1456381\_x\_at Mcl1  
1416880 at Mcl1  
1449007\_at Btg3 /// Gm7334  
1437527\_x at Mcl1  
1456243\_x\_at Mcl1  
1431182\_at Hspa8 /// LOC624853  
1439837 at Gigyf2  
1426958\_at Rps9  
1428694 at Mir17hg  
1448503\_at Mcl1  
1418133\_at Bcl3  
1416067 at Ifrd1  
1451982\_at Map2k4  
1422243 at Fgf7  
1453906\_at Med13l  
1426233\_at Map2k4  
1438405 at Fgf7  
1437785\_at Adamts9

1439030 at Gmppb  
1449268\_at Gfpt1

# Supplementary Figure (Uncropped images for the blots)

## Figure 2C. first row original figure

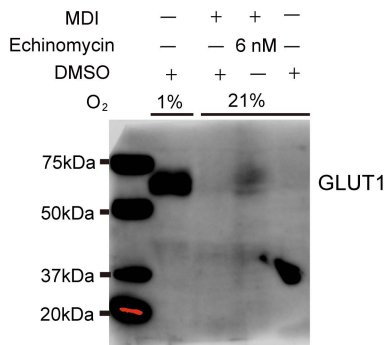

## Figure 2C. second row original figure

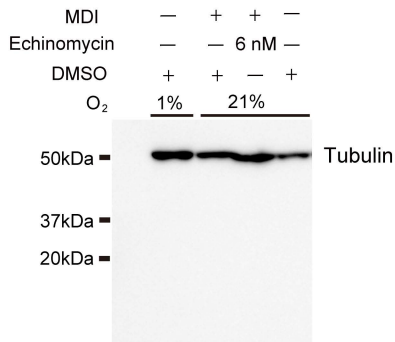

## Figure 2D (left). original figure

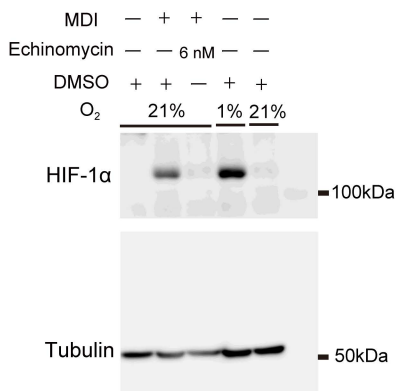

## Figure 2D (right). original figure

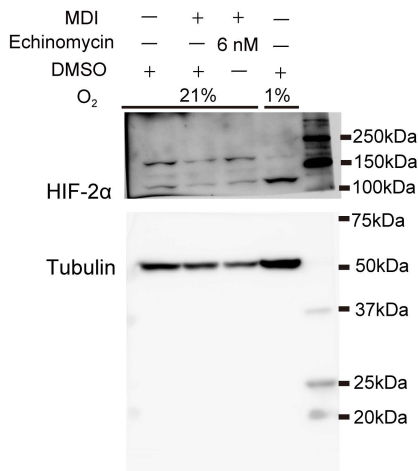

## Figure 5A. first row original figure

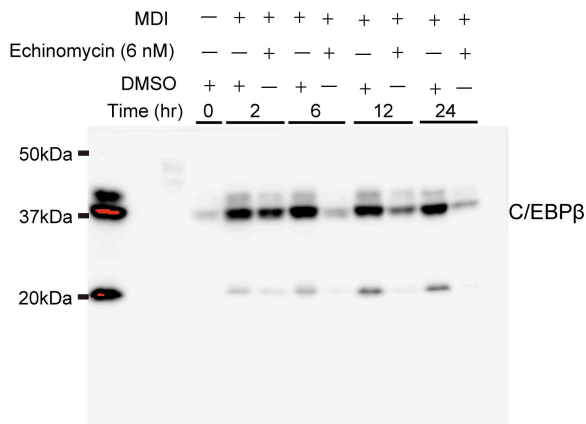

## Figure 5A. second row original figure

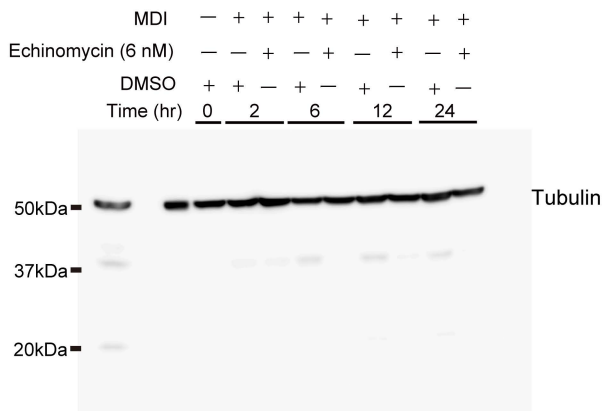

Figure 5C (right). first row original figure

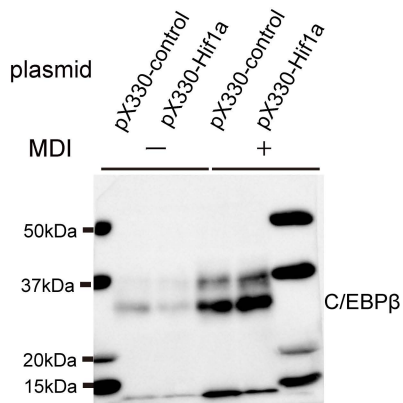

Figure 5C (right). second row original figure

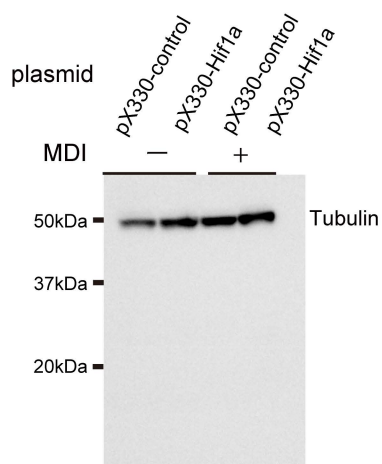

Figure 5D (left). first row original figure

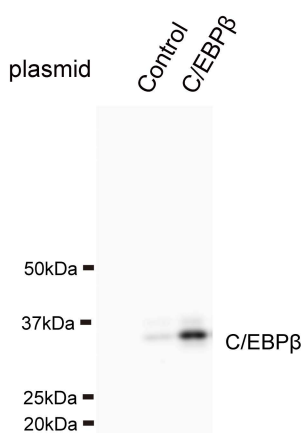

Figure 5D (left). second row original figure

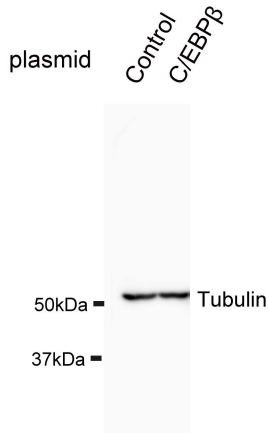

Supplementary Figure (continued) Uncropped images for the blots.
